1     **Synaptotagmin-7 participates in the regulation of acetylcholine release and short-term**  
2                     **presynaptic facilitation in splanchnic nerve terminals**

3  
4     René N. Caballero-Florán<sup>1</sup>, Mounir Bendahmane<sup>1</sup>, Julie M. Philippe<sup>1</sup>, Alina Morales<sup>1</sup>, Arun  
5                     Anantharam<sup>1\*</sup>, Paul M. Jenkins<sup>1,4\*</sup>

6     <sup>1</sup>Department of Pharmacology, University of Michigan Medical School, Ann Arbor, MI 48109-  
7                     5632

8     <sup>4</sup>Department of Psychiatry, University of Michigan Medical School, Ann Arbor, MI 48109-5632

9  
10    \*Corresponding authors:

11    [arunanan@umich.edu](mailto:arunanan@umich.edu)

12    [pjenkins@umich.edu](mailto:pjenkins@umich.edu)

13

14

15 **Abstract**

16 Disturbances that threaten homeostasis elicit activation of the sympathetic nervous  
17 system (SNS) and the adrenal medulla. The effectors discharge as a unit to drive global and  
18 immediate changes in whole-body physiology. Descending sympathetic information is conveyed  
19 to the adrenal medulla via preganglionic splanchnic fibers. These fibers pass into the gland and  
20 synapse onto chromaffin cells, which synthesize, store, and secrete catecholamines and  
21 vasoactive peptides. While the importance of the sympatho-adrenal branch of the autonomic  
22 nervous system has been appreciated for many decades, the mechanisms underlying  
23 transmission between presynaptic splanchnic neurons and postsynaptic chromaffin cells have  
24 remained obscure. In contrast to chromaffin cells, which have enjoyed sustained attention as a  
25 model system for exocytosis, even the  $\text{Ca}^{2+}$  sensors that are expressed within splanchnic  
26 terminals have not yet been identified. This study shows that a ubiquitous  $\text{Ca}^{2+}$ -binding protein,  
27 synaptotagmin-7 (Syt7), is expressed within the fibers that innervate the adrenal medulla, and  
28 that its absence can alter synaptic transmission in the preganglionic terminals of chromaffin cells.  
29 The prevailing impact in presynapses that lack Syt7 is a decrease in synaptic strength and  
30 neuronal short-term plasticity. Evoked excitatory postsynaptic currents (EPSCs) in Syt7 KO  
31 preganglionic terminals are smaller in amplitude than in wild-type synapses stimulated in an  
32 identical manner. Splanchnic inputs also display robust short-term presynaptic facilitation, which  
33 is compromised in the absence of Syt7. These data reveal, for the first time, a role for any  
34 synaptotagmin at the splanchnic-chromaffin cell synapse. They also suggest that Syt7 has actions  
35 at synaptic terminals that are conserved across central and peripheral branches of the nervous  
36 system.

37 **Keywords:** Synaptotagmin-7, synaptotagmin, preganglionic synapses, adrenal medulla

38

## 39 **Introduction**

40           The term “fight-or-flight” refers to the state of heightened physiological and mental arousal  
41 triggered by a physical threat, emotionally charged event, or metabolic disturbance. Although the  
42 precise reaction to each stressor may vary, all share some basic characteristics of sympathetic  
43 activation. The adrenal medulla is a core effector of the sympathetic nervous system in the  
44 periphery [8]. When activated, it discharges a cocktail of powerful hormones (epinephrine,  
45 norepinephrine, and vasoactive peptides) into the suprarenal vein for circulation throughout the  
46 body [54]. These hormones modulate cardiac, pulmonary, and metabolic functions in ways that  
47 favor survival or preserve internal conditions when they are likely to be disturbed [8, 19, 20]. Thus,  
48 many of the “emergency” measures encompassed in the term fight-or-flight, rely on the adrenal  
49 medulla.

50           Secretion from the adrenal medulla is dependent on input from preganglionic, sympathetic  
51 fibers which pass into the gland via the splanchnic nerves [15, 21]. The fibers terminate on  
52 adrenomedullary chromaffin cells which secrete hormones contained in dense core granules [9].  
53 Due to their experimental accessibility, a great deal is now known about the mechanisms  
54 underlying dense core granule exocytosis in chromaffin cells [1, 3]. On the other hand, little is  
55 known about the molecular operation of exocytosis in splanchnic neurons.

56           The purpose of this study was to characterize the role of one synaptic protein in particular  
57 – synaptotagmin-7 (Syt7) – in regulating exocytosis at the splanchnic-chromaffin cell synapse.  
58 Syt7 belongs to a large family of proteins, numbering 17 in total, many of which couple calcium  
59 influx to vesicle fusion [41, 45, 48]. Our interest in Syt7 at splanchnic terminals has developed as  
60 a result of recent discoveries concerning its function at central nervous system (CNS) synapses.  
61 There, Syt7 is now generally acknowledged to regulate synaptic transmission in important ways,  
62 and to be required for forms of synaptic plasticity that are driven by subtle variations in calcium

63 levels, including asynchronous release and facilitation [2, 30, 36, 38, 39, 49]. To date, no  
64 synaptotagmins have been identified in splanchnic neurons.

65 The experiments described here were performed on adrenal slices obtained from wild-  
66 type (WT) animals or animals in which the *Syt7* gene had been deleted (hereafter referred to as  
67 *Syt7* KO) [11]. The absence of *Syt7* had several readily identifiable effects on splanchnic synaptic  
68 transmission, which was evoked by stimulating preganglionic input to chromaffin cells via  
69 electrical stimulation. Specifically, evoked EPSCs in KO slices are smaller in amplitude than those  
70 in WT slices. Decreases in the coefficient of variation ( $CV^2$ ) in evoked EPSCs in KO slices  
71 compared to WT, without changes in the decay, is consistent with a presynaptic modulation of  
72 acetylcholine release probability that involves *Syt7*. Moreover, facilitation, which is ordinarily a  
73 robust property of this synapse, was abrogated in the absence of *Syt7*. The magnitude of tonic or  
74 basal currents on which synchronous EPSCs are imposed was substantially smaller in KO  
75 synapses than in WT synapses. These functional data are supported by fluorescent imaging of  
76 adrenal sections, in which *Syt7*-positive puncta are found to be associated with a marker of  
77 splanchnic neurons, choline acetyltransferase (ChAT).

78 In sum, we demonstrate here that *Syt7* is indeed expressed within the splanchnic fibers  
79 that innervate the adrenal medulla and has a role in evoked release and in facilitation at their  
80 synaptic terminals. These data are the first to document a function for *Syt7* in regulating short-  
81 term synaptic plasticity in the autonomic nervous system.

## 82 **Materials and methods**

### 83 **Animals**

84 Litters of adult male and female *Syt7*<sup>-/-</sup> (gift of Dr. Joel Swanson; [11]) and *Syt7*<sup>+/+</sup> (from a  
85 C57BL/6J background and obtained from Jackson Labs, Bar Harbor, ME) were used in these  
86 studies. Animals were group housed (2 to 5 per ventilated cage) with 24 hr (12/12 dark/light cycle)

87 access to food and water. All animal procedures and experiments were conducted in accordance  
88 with the Institutional Animal Care and Use Committee. No randomization was performed to  
89 allocate subjects in the study.

## 90 ***In Situ* Electrophysiology Recordings and Analysis**

91 *Syt7* +/- mice were crossed to generate *Syt7* -/- or +/- littermates. Mice were genotyped  
92 according to instructions provided by Jackson Labs (<https://www.jax.org/strain/004950>). All  
93 electrophysiological studies were performed on littermates by experimenters blinded to the  
94 genotype of the animal.

95 3-4-month-old animals (male and female; 18 to 25 g) were gas anesthetized using an  
96 isoflurane drop jar technique and sacrificed by guillotine decapitation (all procedures are in  
97 accordance with approved UM IACAC protocol PRO000009265). Chromaffin cells are  
98 responsible for releasing catecholamines in response to stress, including hypoxia. Hence,  
99 isoflurane is used to induce a faster loss of consciousness compared to CO<sub>2</sub> euthanasia (30 s to  
100 1 minute versus several minutes) and reduce animal stress.

101 Adrenal glands were then quickly removed from the kidney and placed in ice cold (4°C)  
102 slicing solution containing, in mM: 62.5 NaCl, 2.5 KCl, 1.25 KH<sub>2</sub>PO<sub>4</sub>, 26 NaHCO<sub>3</sub>, 5 MgCl<sub>2</sub>, 0.5  
103 CaCl<sub>2</sub>, 20 Glucose and 100 Sucrose (pH maintained at 7.4 by saturation with O<sub>2</sub>/CO<sub>2</sub>, 95/5%  
104 respectively) at an osmolarity of ~ 315 milliosmolar (mOsm). Glands were subsequently  
105 embedded in 3.5% agarose block solution at 4°C. Approximately 300 µm thick sections were cut  
106 with a microtome (VF-300, Compresstome™; Precisionary instruments, Natick MA). Slices were  
107 transferred to a stabilization chamber where they were maintained at room temperature for 60  
108 min in artificial cerebrospinal fluid (ACSF) containing in mM: 125 NaCl, 2.5 KCl, 1.25 KH<sub>2</sub>PO<sub>4</sub>, 26  
109 NaHCO<sub>3</sub>, 1 MgCl<sub>2</sub>, 2 CaCl<sub>2</sub> and 20 Glucose, pH 7.4 (with 95% O<sub>2</sub> and 5% CO<sub>2</sub> bubbling through  
110 the solution, ~300 mOsm). Then individual slices were transferred to the microscope to the

111 recording chamber (~300  $\mu$ L volume) continuously superfused with ACSF (1-2 mL/min) at room  
112 temperature.

113 The adrenal gland was visualized at in the microscope (Nikon Eclipse FN-1) at X10 to  
114 determine the recording and stimulation areas. The cholinergic nerve terminals of preganglionic  
115 neurons were activated using a focal stimulating FHC tungsten metal electrode (2-3 M $\Omega$ ). The  
116 electrode was placed in the border between the adrenal cortex and the adrenal medulla around  
117 50 - 100  $\mu$ m away from the recording pipette.

118 Recording micropipettes were pulled (P-97; Sutter Instruments, Novato, CA) from  
119 borosilicate glass capillaries (1.5 mm O.D.; Harvard Apparatus, Holliston, MA) for a final  
120 resistance of 3-6 M $\Omega$ . Pipettes were filled with a cesium-based internal solution of the composition  
121 in mM: 135 CsCl, 4 NaCl, 0.4 GTP, 2 Mg-ATP, 0.5 CaCl<sub>2</sub>, 5 EGTA and 10 HEPES pH 7.25 – 7.3  
122 (290 mOsm). Currents were recorded with Axon Instruments, Multiclamp 700B (Axon  
123 Instruments, Union City, CA), low pass filtered at 2 kHz. Chromaffin cells in medullary slices were  
124 identified using a Nikon Eclipse FN-1 microscope with a X40 water-immersion objective and a  
125 DAGE-MTI IR-1000 video camera. Whole-cell recordings (more than 8 G $\Omega$  before break-in) were  
126 obtained in voltage-clamp configuration, acquired at 2 kHz fixing the voltage at -20 mV. Series  
127 resistance was monitored throughout the experiment and experiments were aborted if changes  
128 greater than 20% occurred. The cells were chosen according to the access resistance and visual  
129 examination of their membranes. The EPSCs were evoked by stimulating the preganglionic input  
130 at 0.1 Hz and were distinguished by their all-or-none response to presynaptic stimulation and fast  
131 kinetics [4, 25, 52]. The reciprocal of the squared coefficient of variation (CV) of the synaptic  
132 response amplitude was quantified as  $(CV)^{-2} = 1 / [(SD/mean)^2]$ . Disparities in this value is often  
133 interpreted as a change in quantal content due to a presynaptically mediated change in transmitter  
134 release [12, 34, 52]. Once a “synapse” was identified, to evaluate short-term synaptic plasticity  
135 the preganglionic input was stimulated at 5 – 50 V intensity (0.5 ms pulse duration) every 15

136 seconds at intervals of 60, 100, 200 and 500 ms or during high frequency trains (20Hz). In some  
137 experiments the calcium concentration in the ACSF was reduced 2mM to 0.5 mM, to avoid  
138 calcium saturation. Stimulation waveforms were introduced via a Grass S48 stimulator (Quincy,  
139 MA) that was triggered using Clampex9 software. Paired-pulse ratio (PPR) of EPSCs were  
140 calculated by dividing the amplitude of the second EPSC2 by that of the first EPSC1 ( $PPR =$   
141  $EPSC2/EPSC1$ ); Differences assessed by PPR parameter will indicate changes in  
142 neurotransmitters release mediated presynaptically [7, 33, 55]. For experiments involving the  
143 application of hexamethonium (hexane-1,6-bis (trimethylammonium bromide)) a non-depolarizing  
144 nicotinic acetylcholine receptor (nAChR) antagonist at concentration of 100 $\mu$ M was added to the  
145 bath, and stimulation was conducted at 0.1 Hz (unless otherwise indicated) the slice was perfused  
146 with ACSF (1-2 mL/min) in presence of the drug for 5 minutes before washout and for before 5  
147 min to obtain a baseline response. Peak current amplitudes were searched identified manually  
148 using pCLAMP 10 (Molecular Devices, San Jose, CA), and visually monitored to exclude the  
149 erroneous noise. The current response was fit by a single exponential equation to obtain the time  
150 constant ( $\tau$ ) of decay. Basal current (during high frequency stimulation) is measured as the  
151 difference between the sustained currents reached during the train and the overall baseline  
152 current of the record [39].

### 153 **Immunofluorescence**

154 3-4-month-old mice (male and female) were administered a ketamine/xylazine mixture (80  
155 mg/kg body weight ketamine and 10 mg/kg xylazine) via intraperitoneal injection. The mice were  
156 perfused by cardiac perfusion of PBS followed by 4% paraformaldehyde (PFA). Adrenal glands  
157 were immediately removed and fat and connective tissues surrounding the glands were trimmed  
158 off. Adrenal tissue was subsequently processed using a standard single-day paraffin preparation  
159 protocol (PBS wash followed by dehydrations through 70%, 95%, and 100% ethanol with final  
160 incubations in xylene and hot paraffin under vacuum) using a Leica ASP 300 paraffin tissue

161 processor. Paraffin sections were cut 7  $\mu$ m thick using a Leica RM2155 microtome and placed on  
162 glass slides. Tissue sections were deparaffinized and rehydrated using a standard protocol of  
163 washes: 3 x 4-min xylene washes, 2 x 2-min 100% ethanol washes, 2 x 2-min 95% ethanol  
164 washes, and 1 x 2-min 70% ethanol wash, followed by at least 5 min in ddH<sub>2</sub>O. Antigen retrieval  
165 was conducted for brain sections by microwaving the deparaffinized brain sections for 20 min in  
166 10  $\mu$ M sodium citrate in water. Sections were cooled, washed for 15 min in ddH<sub>2</sub>O rinsed in PBS  
167 for 5 mins, and blocked using blocking buffer (5% BSA, 0.1% Tween 20 in TBS) for 1 hour at  
168 room temperature. No antigen retrieval was performed for deparaffinized adrenal gland sections.  
169 Immediately following deparaffinization, adrenal glands were incubated with blocking buffer for 1  
170 hour at room temperature. All slides were incubated overnight at 4°C with primary antibodies  
171 diluted in blocking buffer (Rabbit anti Syt7, Mouse anti TH, Goat anti ChAT, diluted 1:400). On  
172 the following day, slices were washed 3x for 15 minutes each with PBS containing 0.2% Tween  
173 20 and incubated with secondary antibodies diluted in blocking buffer for 1hr at room temperature.  
174 Fluorescently conjugated secondary antibodies Alexa 488, 568, and 647 (1:250, Life  
175 Technologies) were used. Secondary antibodies were washed three times with PBS containing  
176 0.2% Tween 20, for 15 minutes each and mounted on glass slides with Prolong Gold.

177 Imaging was performed using a confocal microscope (LSM880, Zeiss, Germany) with a  
178 63x oil immersion objective in the sub-diffraction, Airyscan mode. Excitation was accomplished  
179 using 405-, 488-, 561-, and 633-nm lasers. All images were further processed in Adobe  
180 Photoshop CS6 software.

## 181 **Statistical Analysis**

182 All data were analyzed using GraphPad Prism (Version 8.0) Software, San Diego CA,  
183 USA. The Shapiro-Wilk test was used to ensure normal (Gaussian) distribution of the samples  
184 followed by a Bartlett's test to check the homogeneity of the variances based on the means.  
185 Changes in amplitude of EPSC and PPR were analyzed using two-way ANOVA followed by



186 Sidak's multiple comparisons test to compare differences between experimental conditions, or  
187 one-way ANOVA following by Dunn's multiple comparisons test, as appropriate. When only two  
188 conditions were compared Student's t-test or Mann-Whitney test was used. A significance level  
189 of 0.05 was used for all statistical tests. For box and whisker plots, boxes represent the 25-75%  
190 confidence interval, horizontal lines are the median value, the plus symbol represents the mean,  
191 and the whiskers show the full data range.

## 192 **Results**

### 193 **Synaptotagmin-7 regulates exocytosis at the splanchnic-chromaffin cell synapse**

194 To confirm the contribution of Syt7 in splanchnic-chromaffin cell synapse and determine  
195 whether a presynaptic mechanism was involved, we measured cholinergic synaptic strength in  
196 adrenal gland slices. A stimulation electrode was placed at the border between the cortex and  
197 medulla in an adrenal section prepared as described in the Methods (Figure 1A). Electrical pulses  
198 were applied to stimulate splanchnic processes while recording from chromaffin cells, which were  
199 voltage-clamped in the whole-cell configuration. Excitatory postsynaptic currents (EPSCs),  
200 evoked by splanchnic stimulation, were measured in glands obtained from both WT and Syt7 KO  
201 animals (Figure 1). These currents are reversibly inhibited by the nicotinic receptor antagonist,  
202 hexamethonium (Figure 1B) [52]. The amplitude of evoked EPSCs and charge transferred were  
203 significantly smaller in slices that lack Syt7 compared to WT slices (Figure 1C-E); However, no  
204 difference was detected in single exponential decay time constant of the EPSC (Figure 1F),  
205 indicating that the currents are mediated by a similar pool of acetylcholine receptors [4, 27]. Since  
206 single exponential fits of EPSC decay may not reflect changes in asynchronous release, we  
207 estimated the skewness of the data by normalizing charge transfer to peak EPSC amplitude  
208 (Figure 1G). We did not detect differences between WT and Syt7 KO, consistent with no change  
209 in asynchronous release. Deletion of Syt7 caused a significant decrease in the inverse of the

210 coefficient of variation ( $CV^2$ ) of synaptic current amplitude (Figure 1F) consistent with a  
211 presynaptic modulation of neurotransmitter release probability [12, 34, 52].

212

### 213 **Paired-pulse facilitation is eliminated in synapses lacking Syt7**

214 Syt7 has been reported to function as a specialized calcium sensor that mediates synaptic  
215 facilitation in several types of synapses in the brain [30, 50, 51]. The main purpose of this study  
216 was to test whether it functions in a similar capacity in splanchnic nerve terminals. Figure 2 shows  
217 that facilitation is indeed a property of synapses within the adrenal medulla. This was  
218 demonstrated by applying two successive depolarizing pulses and calculating the paired-pulse  
219 ratio (PPR, the amplitude of the second EPSC divided by the amplitude of the first). Interstimulus  
220 intervals (ISIs) ranging from 60 ms to 200 ms consistently resulted in PPRs above 1 (Figure 2A).  
221 On the other hand, PPRs above 1 were not observed at synapses lacking Syt7, irrespective of  
222 the ISI (Figure 2A). To rule out that this was not a consequence of the first pulse releasing so  
223 much transmitter that the terminals were already partly exhausted, we reduced evoked release  
224 by lowering extracellular calcium from 2.0 mM to 0.5 mM [30] (Figure 2B). Even under these  
225 conditions of low release probability, Syt7-deficient synapses did not exhibit facilitation.

226

### 227 **High frequency trains result in facilitating EPSCs in WT but not Syt7 KO synapses**

228 Chromaffin cells of the adrenal medulla vary dramatically in the rate at which they fire [14,  
229 22]. The variation in firing rate, in turn, may reflect the changing demands placed on them as  
230 effectors of the sympathetic stress response [18]. To model “full activation” of the medulla, a 20  
231 Hz stimulus train was applied to WT and Syt7 KO splanchnic fibers [14]. Under these experimental  
232 conditions, two components are distinguishable: the synchronous release or phasic transmission,  
233 which is the first synaptic response riding on top of the plateau current, and the asynchronous  
234 component, also referred to as tonic transmission or basal current [2, 36-38, 42, 43]. Cholinergic  
235 release increased monotonically during the stimulus train (Figure 3A, C). The net increase in

236 EPSC size may arise from several factors, including facilitation, receptor desensitization, and  
237 spillover [10]. Conversely, high frequency stimulus trains applied to Syt7 KO fibers result in a net  
238 decrease in EPSC size in chromaffin cells (Figures 3B, C, and E). Another notable difference  
239 between the records shown in Figures 3A and 3B is that the basal or tonic current, on top of which  
240 synchronous EPSCs ride, is markedly smaller in the absence of Syt7 (Figure 3D). The  
241 interpretation of the basal current is not simple and will undoubtedly require further research to  
242 clarify its mechanism in this terminal. However, this phenomenon has previously been attributed  
243 to an asynchronous neurotransmitter release component related to the increased likelihood of  
244 vesicle fusion, which can be compromised if Syt7 is absent [37].

245

#### 246 **Synaptotagmin-7 is present in preganglionic, cholinergic axons that innervate the adrenal** 247 **medulla**

248 Aspects of synaptic transmission in the adrenal medulla are compromised in animals  
249 lacking Syt7. Therefore, it was important to verify that Syt7 is localized to splanchnic terminals  
250 responsible for releasing ACh onto chromaffin cells. Immunocytochemical analysis was  
251 performed on adrenal sections which were exposed to antibodies for choline acetyltransferase  
252 (ChAT) and tyrosine hydroxylase (TH) – to label ACh-producing neurons and chromaffin cells,  
253 respectively – in addition to Syt7. ChAT-positive fibers and “varicosities” containing a cluster of  
254 fluorescent ChAT puncta, were frequently observed. The punctate appearance of ChAT  
255 immunofluorescence suggests it may be frequently associated with synaptic vesicles in  
256 splanchnic processes and boutons [17, 46, 47] In WT sections, ChAT clusters were sometimes  
257 enriched in Syt7. One such cluster is boxed in yellow in Figure 4A and expanded in Figure 4B.  
258 Syt7 immunofluorescence was barely detectable in adrenal medullae harvested from Syt7 KO  
259 mice compared to WT littermates (Figure 4A and B). Fluorescent puncta identified by the Syt7  
260 antibody in KO medullae likely result from non-specific labelling of other intracellular material. This

261 supposition is reinforced by Figure 4C, in which Syt7 immunoreactivity is absent from KO  
262 adrenomedullary lysates, as well as Figure 4D, which shows an almost total absence of  
263 fluorescence in Syt7 KO hippocampal sections probed with an anti-Syt7 antibody.

264

## 265 **Discussion**

266 We have shown here that a ubiquitous  $\text{Ca}^{2+}$ -binding protein, Syt7, is expressed within the  
267 neurons that innervate the adrenal medulla. These data are the first to implicate a role for any  
268 synaptotagmin in regulating neurotransmission at the splanchnic-chromaffin cell synapse. As is  
269 the case in the CNS, the functions of Syt7 in the periphery are closely tied to a property that sets  
270 it apart from the other  $\text{Ca}^{2+}$ -binding members of the synaptotagmin family – its exceptionally high  
271 affinity for  $\text{Ca}^{2+}$  [6, 28]. What situations might demand such a  $\text{Ca}^{2+}$  sensor? Two closely related  
272 forms of synaptic plasticity are thought to rely on submicromolar  $\text{Ca}^{2+}$  - asynchronous release and  
273 facilitation [31, 44]. While our experiments initially do not address the possibility of asynchronous  
274 release, facilitation is clearly a robust property of the splanchnic-chromaffin cell synapse (Figure  
275 2). And, consistent with published studies in central synapses [30, 51], facilitation is prevented in  
276 the absence of Syt7, whether it is driven by a pair of closely-spaced depolarizing pulses, or a high  
277 frequency stimulus train (Figures 2 and 3).

278 While the single EPSCs properties we describe here are consistent with those previously  
279 reported in identical gland preparations [4, 27, 32, 52], the decrease in evoked EPSCs amplitude  
280 in Sy7KO synapses compared with WT(Figure 1), was not expected in single stimulus  
281 experiments. This differs from what has been previously shown with respect to the impact of Syt7  
282 on baseline synaptic responses [30, 36]. We did not detect differences in the decay time constant  
283 of EPSCs evoked by a single stimulus (Figure 1F), suggesting that a similar group of receptors is  
284 being activated in WT and Syt7 KO mice. The high degree of overlap in time course in the decay

285 times between EPSCs in Syt7 vs WT indicates that transmitter vesicles are released with a high  
286 degree of synchrony when synapses are stimulated, and the fact that the evoked currents are  
287 prevented by hexamethonium indicate that they are acetylcholine-dependent [32, 52]. This is  
288 consistent with other studies that have reported changes in amplitude of stimulated currents,  
289 without concomitant changes in kinetics, likely due to alterations in the amount of neurotransmitter  
290 coming from presynaptic terminals [42, 43].

291         There are a number of potential explanations for the difference in baseline EPSCs in Syt7  
292 KO splanchnic terminals. It may be that fewer presynaptic axons are activated by the stimulation  
293 electrode in Syt7 KO adrenal sections, possibly resulting from a different arrangement of fibers  
294 entering the medulla. However, chromaffin cells in situ are stimulated simultaneously by  
295 splanchnic nerve fibers, which are more relevant than gap-junctions, indicating that stimulation is  
296 likely an all-or-none event [32]. Altered EPSC amplitudes in the KO could also be due, in theory,  
297 to a reduction in postsynaptic nicotinic receptor expression. However, It was previously shown  
298 that nicotinic currents in dissociated WT and Syt7 KO chromaffin cells are not discernibly different,  
299 rendering such a possibility unlikely [5]. Note as well that robust synchronous EPSCs are still  
300 evident in Syt7 KO medullae, which does suggest other “fast” synaptotagmins (e.g., Syt1, Syt2,  
301 etc.) are likely expressed in splanchnic neurons and collaborate with Syt7 to regulate exocytosis.

302         Neurotransmitter release evoked with only a single pulse in WT mice is almost completely  
303 synchronous, but seriously compromised in Syt1-deficient mice, which still have considerable  
304 residual current upon one pulse stimulation. This small amount of residual current at the synapses  
305 in Syt1 KO cells is primarily asynchronous release and occurs at both excitatory and inhibitory  
306 synapses [42]. Therefore, in WT mice, even the evocation of currents by a single pulse can  
307 present an asynchronous release fraction, so it is possible that the amount of remnant  
308 neurotransmitter (asynchronous release) released in Syt1 absence, is the same that we are losing  
309 in the absence of Syt7, and it is for this reason that we detected a decrease in presynaptically  
310 evoked EPSCs amplitude from Syt7 KO compared with WT (Figure1). A similar situation occurs

311 in Syt7/Syt2-deficient calyx synapses where evoked synchronous neurotransmitter release,  
312 showed decrease in amplitude of EPSCs evoked by isolated action potentials [39].

313 Another hypothesis would be that current amplitude decrease in Syt7 KO vs. WT it could  
314 be related with the postsynaptic feedback after stimulation and Ach receptors activation.  
315 Neuropeptide Y (NPY) is co-stored and co-released with the catecholamine's in chromaffin cells  
316 and is required to maintain preganglionic-chromaffin cell synaptic strength, an effect mediated by  
317 activation of adrenal presynaptic Y5 receptors. NPY-KO mice was decrease in single pulse  
318 evoked EPSCs amplitude in adrenal slices from fasted mice [52], like our Syt7 KO condition  
319 (Figure 1). It could be interpreted that the difference in amplitude of EPSCs in Syt7 KO with  
320 respect to WT is influenced by a decrease in NPY release and therefore a lower activation of  
321 presynaptic Y5 receptors; due to the already diminished strength of the cholinergic preganglionic-  
322 chromaffin cell synapse in the Syt7 KO. In addition, the difference in the coefficient of variation  
323 ( $CV^{-2}$ ) in the amplitude of the synaptic current in single pulse stimulation (Figure 1), is consistent  
324 with the idea that the decrease in synaptic strength is due to a mechanism presynaptic where the  
325 probability of transmitter release is decreased in the absence of Syt7.

326 No evidence was found in this study for delayed release of neurotransmitter that persists  
327 after the end of a single action potential in our preparations as neither spontaneous nor miniature  
328 EPSCs were detected in our recordings. Spontaneous electrical activity in the slices of the adrenal  
329 gland is not routinely observed, unless it is caused by excitation by high concentrations of  
330 potassium [32, 52]. Syt7 is not on its own required for clamping spontaneous mini release or for  
331 mediating fast calcium-triggered release, consistent with previous studies on other synapses [2,  
332 30, 38, 53]. Previous studies in CNS neurons have shown that overexpressed Syt7 can increase  
333 mini release[2]. Therefore, the clamping function by Syt7 may not be apparent under physiological  
334 conditions in the splanchnic synapse because Syt7 may not be expressed at sufficiently high  
335 levels, especially within presynaptic terminals.

336 Differences between WT and Syt7 KO synapses were detected beyond the synchronous  
337 component of the evoked EPSC. The basal current, on top of which synchronous EPSCs ride,  
338 was also substantially reduced in synapses that lacked Syt7. Although basal current has  
339 frequently been attributed to an asynchronous component of release (i.e., where secretion is not  
340 time-locked to the arrival of an action potential; [39]), its origins at the splanchnic-chromaffin cell  
341 synapse are not immediately obvious. For example, the basal current may report on the  
342 stimulation of chromaffin cells by neurotransmitter that has “spilled over” from neighboring  
343 terminals – a phenomenon that has been extensively studied at central synapses [10, 16, 35] –  
344 or it may reflect the direct activation of non-canonical (e.g., GPCR-dependent), slow postsynaptic  
345 conductances known to be active in the medulla [25]. Splanchnic neurons are known to house  
346 and secrete a multitude of peptide cargos [22]. We cannot yet account for the various ways, subtle  
347 or otherwise, in which peptidergic neurotransmission contributes to the phenomena measured  
348 here. The basal current may also reflect electrotonic current spread from one depolarized  
349 chromaffin cell to another. Electric coupling is believed to be enhanced in conditions of increased  
350 splanchnic nerve activity [23, 26].

351 Although it is possible that desensitization of postsynaptic receptors could play a role in  
352 the decreases in basal current, previous studies have shown that desensitization does not play a  
353 major role in this synapse. At peripheral ganglionic synapses, acetylcholine receptor-mediated  
354 EPSCs can last up to ten minutes in the presence of neostigmine, an acetylcholinesterase  
355 inhibitor, without being desensitized, an effect that is blocked by DHBE, a nicotinic antagonist  
356 [13]. Similarly, recordings performed in the presence of a high concentration of potassium  
357 (25mM), also in adrenal gland slices, show that it is possible to measure EPSCs even with high  
358 neurotransmitter concentrations in the intrasynaptic space [32]. Both previous strategies likely  
359 involve the release of acetylcholine in much greater quantity than the stimulation of the short  
360 remaining fibers that we are stimulating in our preparation. We hypothesize that the changes in  
361 the phasic current as well as in the basal current, are both consequences of the decrease in the

362 neurotransmitter amount coming from the presynaptic terminals where Syt7 is absent (Figures 3  
363 and 4). Clearance of by transporters may play an important role in this process.

364 Overall, this study provides strong evidence that basic functions of splanchnic-chromaffin  
365 cell synapse operation depend on Syt7, including a form of short-term synaptic plasticity termed  
366 facilitation. It has been suggested that facilitating synapses signal high frequency information to  
367 target cells, thereby modulating their excitability [29]. However, the physiological role of facilitation  
368 has remained elusive. In the context of the sympatho-adrenal system, facilitation may have a role  
369 in amplifying epinephrine discharge from chromaffin cells during conditions that increase  
370 sympathetic tone, including hypoglycemia [40, 52]. The resulting increase in circulating  
371 epinephrine would then be expected to increase blood glucose via multiple metabolic pathways  
372 [24, 40, 52]. A hypothesis, which future studies should test, is that regulated physiological  
373 responses to metabolic stressors (e.g., fasting) will require release driven by splanchnic Syt7.  
374 Such studies may have to wait until Syt7 expression can be abrogated solely in the periphery,  
375 and in a tissue-specific manner. In fact, tissue-specific deletion of Syt7 will be necessary to  
376 definitively disentangle its functions in controlling CNS drive of the sympathetic nervous system,  
377 from pre- and post-synaptic functions of Syt7 in the adrenal medulla. While these sorts of efforts  
378 will not be trivial, the data presented here encourage deeper investigations into the molecular  
379 mechanisms of release at these and other autonomic synapses about which very little is known.

380

### 381 **Acknowledgements**

382 We would like to thank Dr. Will Birdsong (University of Michigan) and Dr. Kevin Bender (UCSF)  
383 for critical discussion of our data.

### 384 **Funding**

385 This work was support by NIH R01NS122534 (AA).

386



387 **Figure Legends**

388 **Figure 1. Comparison of evoked EPSCs in WT and Syt7 KO synapses.** EPSCs were evoked  
389 by stimulating preganglionic input to the adrenal medulla with a bipolar stimulating electrode.  
390 Cartoons created with BioRender ([www.biorender.com](http://www.biorender.com)). **B.** EPSCs recorded in a chromaffin cell  
391 evoked by stimulating the preganglionic nerve terminals (black) were blocked by the cholinergic  
392 antagonist hexamethonium (red), and recovered during washout (blue), \* $p=0.032$ , Kruskal-Wallis,  
393 Dunn's multiple comparisons (n=5 slices; 3 independent preps). Representative EPSCs at WT  
394 synapses: Control (black), during block by Hexamethonium (Hex, red), and after Washout (blue)  
395 (*inset*). **C.** EPSCs recorded in chromaffin cells by stimulating the WT (black) and Syt7 KO (red)  
396 preganglionic nerve terminals. **D.** Averaged peak amplitudes of evoked EPSCs from Syt7 KO  
397 (red) are decreased compared to WT (black). \*\*\* $p < 0.001$ , Mann Whitney test (n=14 WT and n=9  
398 KO slices; > 6 independent preps). **E.** Average EPSC charge transfer from Syt7 KO (red) mice  
399 are decreased compared to WT (black) mice. \*\*\* $p < 0.001$ , Mann Whitney test (n=14 WT and n=9  
400 KO slices; > 6 independent preps). **F.** Average decay time constants of evoked EPSCs in  
401 chromaffin cells after stimulation of WT (black) and Syt7 KO (red) axons.  $p=ns$ , Mann Whitney  
402 test (n=14 WT and n=9 KO slices; >6 independent preps). **G.** Charge transfer normalized to peak  
403 EPSC amplitude from evoked EPSCs are not different in WT (black) mice compared to Syt7 KO  
404 (red) mice.  $p=ns$ , Mann Whitney test (n=14 WT and n=9 KO slices; >6 independent preps) .**H.**  
405  $CV^{-2}$  of the EPSC amplitude was significantly greater in chromaffin cells from WT (black)  
406 compared to Syt7 KO (red) mice. \*\* $p < 0.05$ , Mann Whitney test (n=14 WT and n=9 KO slices; >  
407 6 independent preps).

408  
409 **Figure 2. Synaptic facilitation is evident in WT but not Syt7 KO medullae.** **A.** Representative  
410 traces (top) and averaged paired-pulse ratio (PPRs)  $\pm$  SEM from evoked EPSCs at different  
411 interstimulus intervals (ISIs). PPRs at WT (black) and Syt7 KO (red) synapses are significantly  
412 different at ISIs of 60, 100 and 200 ms intervals but not at 500 ms.  $F(1, 79) = 35.76$  \*\* $p=0.002$ ,

413 \*\*\* $p < 0.001$ , Two-way ANOVA (n=13 WT and n=13 KO slices; >6 independent preps). **B.**  
414 Experiments were repeated at low extracellular  $\text{Ca}^{2+}$  (0.5 mM) and PPRs calculated as in A.  
415 \* $p = 0.01$ , Two-way ANOVA (n=13 WT and n=15 KO slices; >6 independent preps).

416

417 **Figure 3. Basal current is reduced at Syt7 KO synapses.** A, B. Synaptic responses to 20 Hz  
418 stimulation recorded from WT (black) and Syt7 KO (red) preparations. Expanded traces show the  
419 basal current. C. Summary graph of individual EPSC amplitudes normalized to the first EPSC  
420 amplitude during a train (WT in black and Syt7 KO in red). D. Summary graph of the average  
421 basal current, basal current amplitudes was significantly greater in chromaffin cells from WT  
422 (black) compared to Syt7 KO (red) mice \*\*\* $p < 0.001$ ,  $t = 3.840$ ,  $df = 26$  Student's t-test (n=12 WT and  
423 n=16 KO slices; > 6 independent preps). (n=7 WT and n=11 KO slices; >4 independent preps).  
424 E. Average of PPRs calculated by dividing the second EPSC in the train by the first is. Facilitation  
425 is reduced in in chromaffin cells from Syt7 KO (red) compared with WT (black) mice \*\*\* $p = 0.005$ ,  
426  $t = 6.515$ ,  $df = 26$  Student's t-test (n=12 WT and n=16 KO slices; >6 independent preps)

427

428 **Figure 4. Syt7 is expressed in splanchnic processes and chromaffin cells in the adrenal**  
429 **medulla.** **A.** Adrenal slices were immunostained with antibodies to choline acetyltransferase  
430 (ChAT) (white), tyrosine hydroxylase (TH) (magenta), and Syt7 (green). DAPI is included as a  
431 nuclear stain. Syt7 is co-localized with areas of ChAT and TH fluorescence, indicating that it is  
432 expressed in both splanchnic processes, as well as chromaffin cells, respectively. Scale bar, 5  
433  $\mu\text{m}$ . Some non-specific fluorescence is apparent in Syt7 KO slices exposed to the Syt7 antibody.  
434 Clusters of ChAT puncta were frequently observed in both WT and Syt7 KO slices. Two such  
435 regions are boxed (yellow) and expanded in **B.** **B.** A ChAT cluster enriched in Syt7 in a WT slice.  
436 A similar ChAT cluster in a Syt7 KO slice is also shown. Scale bar, 1  $\mu\text{m}$ . **C.** Lysates from WT  
437 and Syt7 KO adrenal glands (2 in each lane) were run on a gel, transferred to nitrocellulose, and

438 probed for Syt7 (top). Immunoreactivity for Syt7 is absent in Syt7 KO adrenal lysates. Alpha  
439 tubulin (bottom) was used as a loading control. Data are representative of 3 separate  
440 experiments. **D.** Representative images of the CA1 subfield of the hippocampus taken from  
441 coronal brain sections of wild-type (top) or Syt7 KO (bottom) mice immunoassayed with antibodies  
442 against Syt7 (green). Scale bar, 20  $\mu$ m.

443

444

445

446

447 **References**

- 448 [1] A. Anantharam, A.J.B. Kreutzberger, Unraveling the mechanisms of calcium-dependent  
449 secretion, *J Gen Physiol* 151 (2019) 417-434.
- 450 [2] T. Bacaj, D. Wu, X. Yang, W. Morishita, P. Zhou, W. Xu, R.C. Malenka, T.C. Sudhof,  
451 Synaptotagmin-1 and synaptotagmin-7 trigger synchronous and asynchronous phases  
452 of neurotransmitter release, *Neuron* 80 (2013) 947-959.
- 453 [3] M.F. Bader, R.W. Holz, K.O.N.O. Kumakura, N.I.C.O. Vitale, Exocytosis: The Chromaffin  
454 Cell As a Model System, *Annals of the New York Academy of Sciences* 971 (2002) 178-  
455 183.
- 456 [4] J.G. Barbara, K. Takeda, Quantal release at a neuronal nicotinic synapse from rat  
457 adrenal gland, *Proc Natl Acad Sci U S A* 93 (1996) 9905-9909.
- 458 [5] M. Bendahmane, A. Morales, A.J.B. Kreutzberger, N.A. Schenk, R. Mohan, S. Bakshi,  
459 J.M. Philippe, S. Zhang, V. Kiessling, L.K. Tamm, D.R. Giovannucci, P.M. Jenkins, A.  
460 Anantharam, Synaptotagmin-7 enhances calcium-sensing of chromaffin cell granules  
461 and slows discharge of granule cargos, *J Neurochem* (2020).
- 462 [6] A. Bhalla, W.C. Tucker, E.R. Chapman, Synaptotagmin isoforms couple distinct ranges  
463 of Ca<sup>2+</sup>, Ba<sup>2+</sup>, and Sr<sup>2+</sup> concentration to SNARE-mediated membrane fusion,  
464 *Molecular biology of the cell* 16 (2005) 4755-4764.
- 465 [7] R.N. Caballero-Floran, I. Conde-Rojas, A.O. Chavez, H. Cortes-Calleja, L.F. Lopez-  
466 Santiago, L.L. Isom, J. Aceves, D. Erlij, B. Floran, Cannabinoid-induced depression of  
467 synaptic transmission is switched to stimulation when dopaminergic tone is increased in  
468 the globus pallidus of the rodent, *Neuropharmacology* 110 (2016) 407-418.
- 469 [8] W.B. Cannon, The Adrenal Medulla, *Bull N Y Acad Med* 16 (1940) 3-13.
- 470 [9] S.W. Carmichael, H. Winkler, The adrenal chromaffin cell, *Scientific American* 253  
471 (1985) 40-49.
- 472 [10] A.G. Carter, W.G. Regehr, Prolonged synaptic currents and glutamate spillover at the  
473 parallel fiber to stellate cell synapse, *J Neurosci* 20 (2000) 4423-4434.
- 474 [11] S. Chakrabarti, K.S. Kobayashi, R.A. Flavell, C.B. Marks, K. Miyake, D.R. Liston, K.T.  
475 Fowler, F.S. Gorelick, N.W. Andrews, Impaired membrane resealing and autoimmune  
476 myositis in synaptotagmin VII-deficient mice, *The Journal of cell biology* 162 (2003) 543-  
477 549.
- 478 [12] L.E. Chaveznoriega, C.F. Stevens, Increased Transmitter Release at Excitatory  
479 Synapses Produced by Direct Activation of Adenylate-Cyclase in Rat Hippocampal  
480 Slices, *Journal of Neuroscience* 14 (1994) 310-317.
- 481 [13] B.L. d'Incamps, E. Krejci, P. Ascher, Mechanisms Shaping the Slow Nicotinic Synaptic  
482 Current at the Motoneuron-Renshaw Cell Synapse, *Journal of Neuroscience* 32 (2012)  
483 8413-8423.
- 484 [14] A.M. de Diego, L. Gandia, A.G. Garcia, A physiological view of the central and peripheral  
485 mechanisms that regulate the release of catecholamines at the adrenal medulla, *Acta  
486 Physiol (Oxf)* 192 (2008) 287-301.
- 487 [15] E. De Robertis, A.V. Ferreira, Submicroscopic changes of the nerve endings in the  
488 adrenal medulla after stimulation of the splanchnic nerve, *J Biophys Biochem Cytol* 3  
489 (1957) 611-614.
- 490 [16] J.S. Diamond, A broad view of glutamate spillover, *Nat Neurosci* 5 (2002) 291-292.
- 491 [17] L. Eder-Colli, S. Amato, Membrane-bound choline acetyltransferase in Torpedo electric  
492 organ: a marker for synaptosomal plasma membranes?, *Neuroscience* 15 (1985) 577-  
493 589.
- 494 [18] T. Fulop, S. Radabaugh, C. Smith, Activity-Dependent Differential Transmitter Release  
495 in Mouse Adrenal Chromaffin Cells, *Journal of Neuroscience* 25 (2005) 7324-7332.

- 496 [19] D.S. Goldstein, Adrenal responses to stress, *Cellular and molecular neurobiology* 30  
497 (2010) 1433-1440.
- 498 [20] D.S. Goldstein, I.J. Kopin, Evolution of concepts of stress, *Stress* 10 (2007) 109-120.
- 499 [21] O. Grynspan-Winograd, Adrenaline and noradrenaline cells in the adrenal medulla of  
500 the hamster: a morphological study of their innervation, *J Neurocytol* 3 (1974) 341-361.
- 501 [22] N.C. Guerineau, Cholinergic and peptidergic neurotransmission in the adrenal medulla:  
502 A dynamic control of stimulus-secretion coupling, *IUBMB Life* (2019).
- 503 [23] N.C. Guerineau, M.G. Desarmenien, V. Carabelli, E. Carbone, Functional Chromaffin  
504 Cell Plasticity in Response to Stress: Focus on Nicotinic, Gap Junction, and Voltage-  
505 Gated Ca(2+) Channels, *Journal of molecular neuroscience : MN* (2012).
- 506 [24] R. Gupta, Y. Ma, M. Wang, M.D. Whim, AgRP-Expressing Adrenal Chromaffin Cells Are  
507 Involved in the Sympathetic Response to Fasting, *Endocrinology* 158 (2017) 2572-2584.
- 508 [25] J. Hill, S.A. Chan, B. Kuri, C. Smith, Pituitary adenylate cyclase-activating peptide  
509 (PACAP) recruits low voltage-activated T-type calcium influx under acute sympathetic  
510 stimulation in mouse adrenal chromaffin cells, *J Biol Chem* 286 (2011) 42459-42469.
- 511 [26] J. Hill, S.K. Lee, P. Samasilp, C. Smith, Pituitary adenylate cyclase-activating peptide  
512 enhances electrical coupling in the mouse adrenal medulla, *Am J Physiol Cell Physiol*  
513 303 (2012) C257-266.
- 514 [27] M.E. Holman, H.A. Coleman, M.A. Tonta, H.C. Parkington, Synaptic Transmission from  
515 Splanchnic Nerves to the Adrenal-Medulla of Guinea-Pigs, *J Physiol-London* 478 (1994)  
516 115-124.
- 517 [28] E. Hui, J. Bai, P. Wang, M. Sugimori, R.R. Llinas, E.R. Chapman, Three distinct kinetic  
518 groupings of the synaptotagmin family: candidate sensors for rapid and delayed  
519 exocytosis, *Proc Natl Acad Sci U S A* 102 (2005) 5210-5214.
- 520 [29] S.L. Jackman, W.G. Regehr, The Mechanisms and Functions of Synaptic Facilitation,  
521 *Neuron* 94 (2017) 447-464.
- 522 [30] S.L. Jackman, J. Turecek, J.E. Belinsky, W.G. Regehr, The calcium sensor  
523 synaptotagmin 7 is required for synaptic facilitation, *Nature* 529 (2016) 88-91.
- 524 [31] P.S. Kaeser, W.G. Regehr, Molecular mechanisms for synchronous, asynchronous, and  
525 spontaneous neurotransmitter release, *Annu Rev Physiol* 76 (2014) 333-363.
- 526 [32] R. Kajiwara, O. Sand, Y. Kidokoro, M.E. Barish, T. Iijima, Functional organization of  
527 chromaffin cells and cholinergic synaptic transmission in rat adrenal medulla, *Jpn J*  
528 *Physiol* 47 (1997) 449-464.
- 529 [33] H. Kamiya, R.S. Zucker, Residual Ca<sup>2+</sup> and Short-Term Synaptic Plasticity, *Nature* 371  
530 (1994) 603-606.
- 531 [34] P.M. Lachamp, Y. Liu, S.J. Liu, Glutamatergic Modulation of Cerebellar Interneuron  
532 Activity Is Mediated by an Enhancement of GABA Release and Requires Protein Kinase  
533 A/RIM1 alpha Signaling, *Journal of Neuroscience* 29 (2009) 381-392.
- 534 [35] B. Lamotte d'Incamps, E. Krejci, P. Ascher, Mechanisms shaping the slow nicotinic  
535 synaptic current at the motoneuron-renshaw cell synapse, *J Neurosci* 32 (2012) 8413-  
536 8423.
- 537 [36] H. Liu, H. Bai, E. Hui, L. Yang, C.S. Evans, Z. Wang, S.E. Kwon, E.R. Chapman,  
538 Synaptotagmin 7 functions as a Ca<sup>2+</sup>-sensor for synaptic vesicle replenishment, *Elife* 3  
539 (2014) e01524.
- 540 [37] T. Lu, L.O. Trussell, Inhibitory transmission mediated by asynchronous transmitter  
541 release, *Neuron* 26 (2000) 683-694.
- 542 [38] F. Luo, T. Bacaj, T.C. Sudhof, Synaptotagmin-7 Is Essential for Ca<sup>2+</sup>-Triggered Delayed  
543 Asynchronous Release But Not for Ca<sup>2+</sup>-Dependent Vesicle Priming in Retinal Ribbon  
544 Synapses, *J Neurosci* 35 (2015) 11024-11033.

- 545 [39] F. Luo, T.C. Sudhof, Synaptotagmin-7-Mediated Asynchronous Release Boosts High-  
546 Fidelity Synchronous Transmission at a Central Synapse, *Neuron* 94 (2017) 826-839  
547 e823.
- 548 [40] Y. Ma, Q. Wang, D. Joe, M. Wang, M.D. Whim, Recurrent hypoglycemia inhibits the  
549 counterregulatory response by suppressing adrenal activity, *J Clin Invest* 128 (2018)  
550 3866-3871.
- 551 [41] D.D. MacDougall, Z. Lin, N.L. Chon, S.L. Jackman, H. Lin, J.D. Knight, A. Anantharam,  
552 The high-affinity calcium sensor synaptotagmin-7 serves multiple roles in regulated  
553 exocytosis, *J Gen Physiol* 150 (2018) 783-807.
- 554 [42] A. Maximov, T.C. Sudhof, Autonomous function of synaptotagmin 1 in triggering  
555 synchronous release independent of asynchronous release, *Neuron* 48 (2005) 547-554.
- 556 [43] Y. Otsu, V. Shahrezaei, B. Li, L.A. Raymond, K.R. Delaney, T.H. Murphy, Competition  
557 between phasic and asynchronous release for recovered synaptic vesicles at developing  
558 hippocampal autaptic synapses, *Journal of Neuroscience* 24 (2004) 420-433.
- 559 [44] R. Rahamimoff, Y. Yaari, Delayed release of transmitter at the frog neuromuscular  
560 junction, *J Physiol* 228 (1973) 241-257.
- 561 [45] G. Schiavo, S.L. Osborne, J.G. Sgouros, Synaptotagmins: more isoforms than  
562 functions?, *Biochem Biophys Res Commun* 248 (1998) 1-8.
- 563 [46] D. Sha, H. Jin, R.D. Kopke, J.Y. Wu, Choline acetyltransferase: regulation and coupling  
564 with protein kinase and vesicular acetylcholine transporter on synaptic vesicles,  
565 *Neurochem Res* 29 (2004) 199-207.
- 566 [47] L.K. Smith, P.T. Carroll, Membrane-bound choline-O-acetyltransferase in rat  
567 hippocampal tissue is anchored by glycosyl-phosphatidylinositol, *Brain Res* 605 (1993)  
568 155-163.
- 569 [48] S. Sugita, O.H. Shin, W. Han, Y. Lao, T.C. Sudhof, Synaptotagmins form a hierarchy of  
570 exocytotic Ca(2+) sensors with distinct Ca(2+) affinities, *The EMBO journal* 21 (2002)  
571 270-280.
- 572 [49] J. Turecek, S.L. Jackman, W.G. Regehr, Synaptotagmin 7 confers frequency invariance  
573 onto specialized depressing synapses, *Nature* 551 (2017) 503-506.
- 574 [50] J. Turecek, W.G. Regehr, Neuronal Regulation of Fast Synaptotagmin Isoforms Controls  
575 the Relative Contributions of Synchronous and Asynchronous Release, *Neuron* 101  
576 (2019) 938-949 e934.
- 577 [51] J. Turecek, W.G. Regehr, Synaptotagmin 7 Mediates Both Facilitation and  
578 Asynchronous Release at Granule Cell Synapses, *J Neurosci* 38 (2018) 3240-3251.
- 579 [52] M. Wang, Q. Wang, M.D. Whim, Fasting induces a form of autonomic synaptic plasticity  
580 that prevents hypoglycemia, *Proc Natl Acad Sci U S A* 113 (2016) E3029-3038.
- 581 [53] H. Wen, M.W. Linhoff, M.J. McGinley, G.L. Li, G.M. Corson, G. Mandel, P. Brehm,  
582 Distinct roles for two synaptotagmin isoforms in synchronous and asynchronous  
583 transmitter release at zebrafish neuromuscular junction, *P Natl Acad Sci USA* 107  
584 (2010) 13906-13911.
- 585 [54] K. Wolf, G. Zarkua, S.A. Chan, A. Sridhar, C. Smith, Spatial and activity-dependent  
586 catecholamine release in rat adrenal medulla under native neuronal stimulation, *Physiol*  
587 *Rep* 4 (2016).
- 588 [55] R.S. Zucker, Calcium- and activity-dependent synaptic plasticity, *Curr Opin Neurobiol* 9  
589 (1999) 305-313.

590



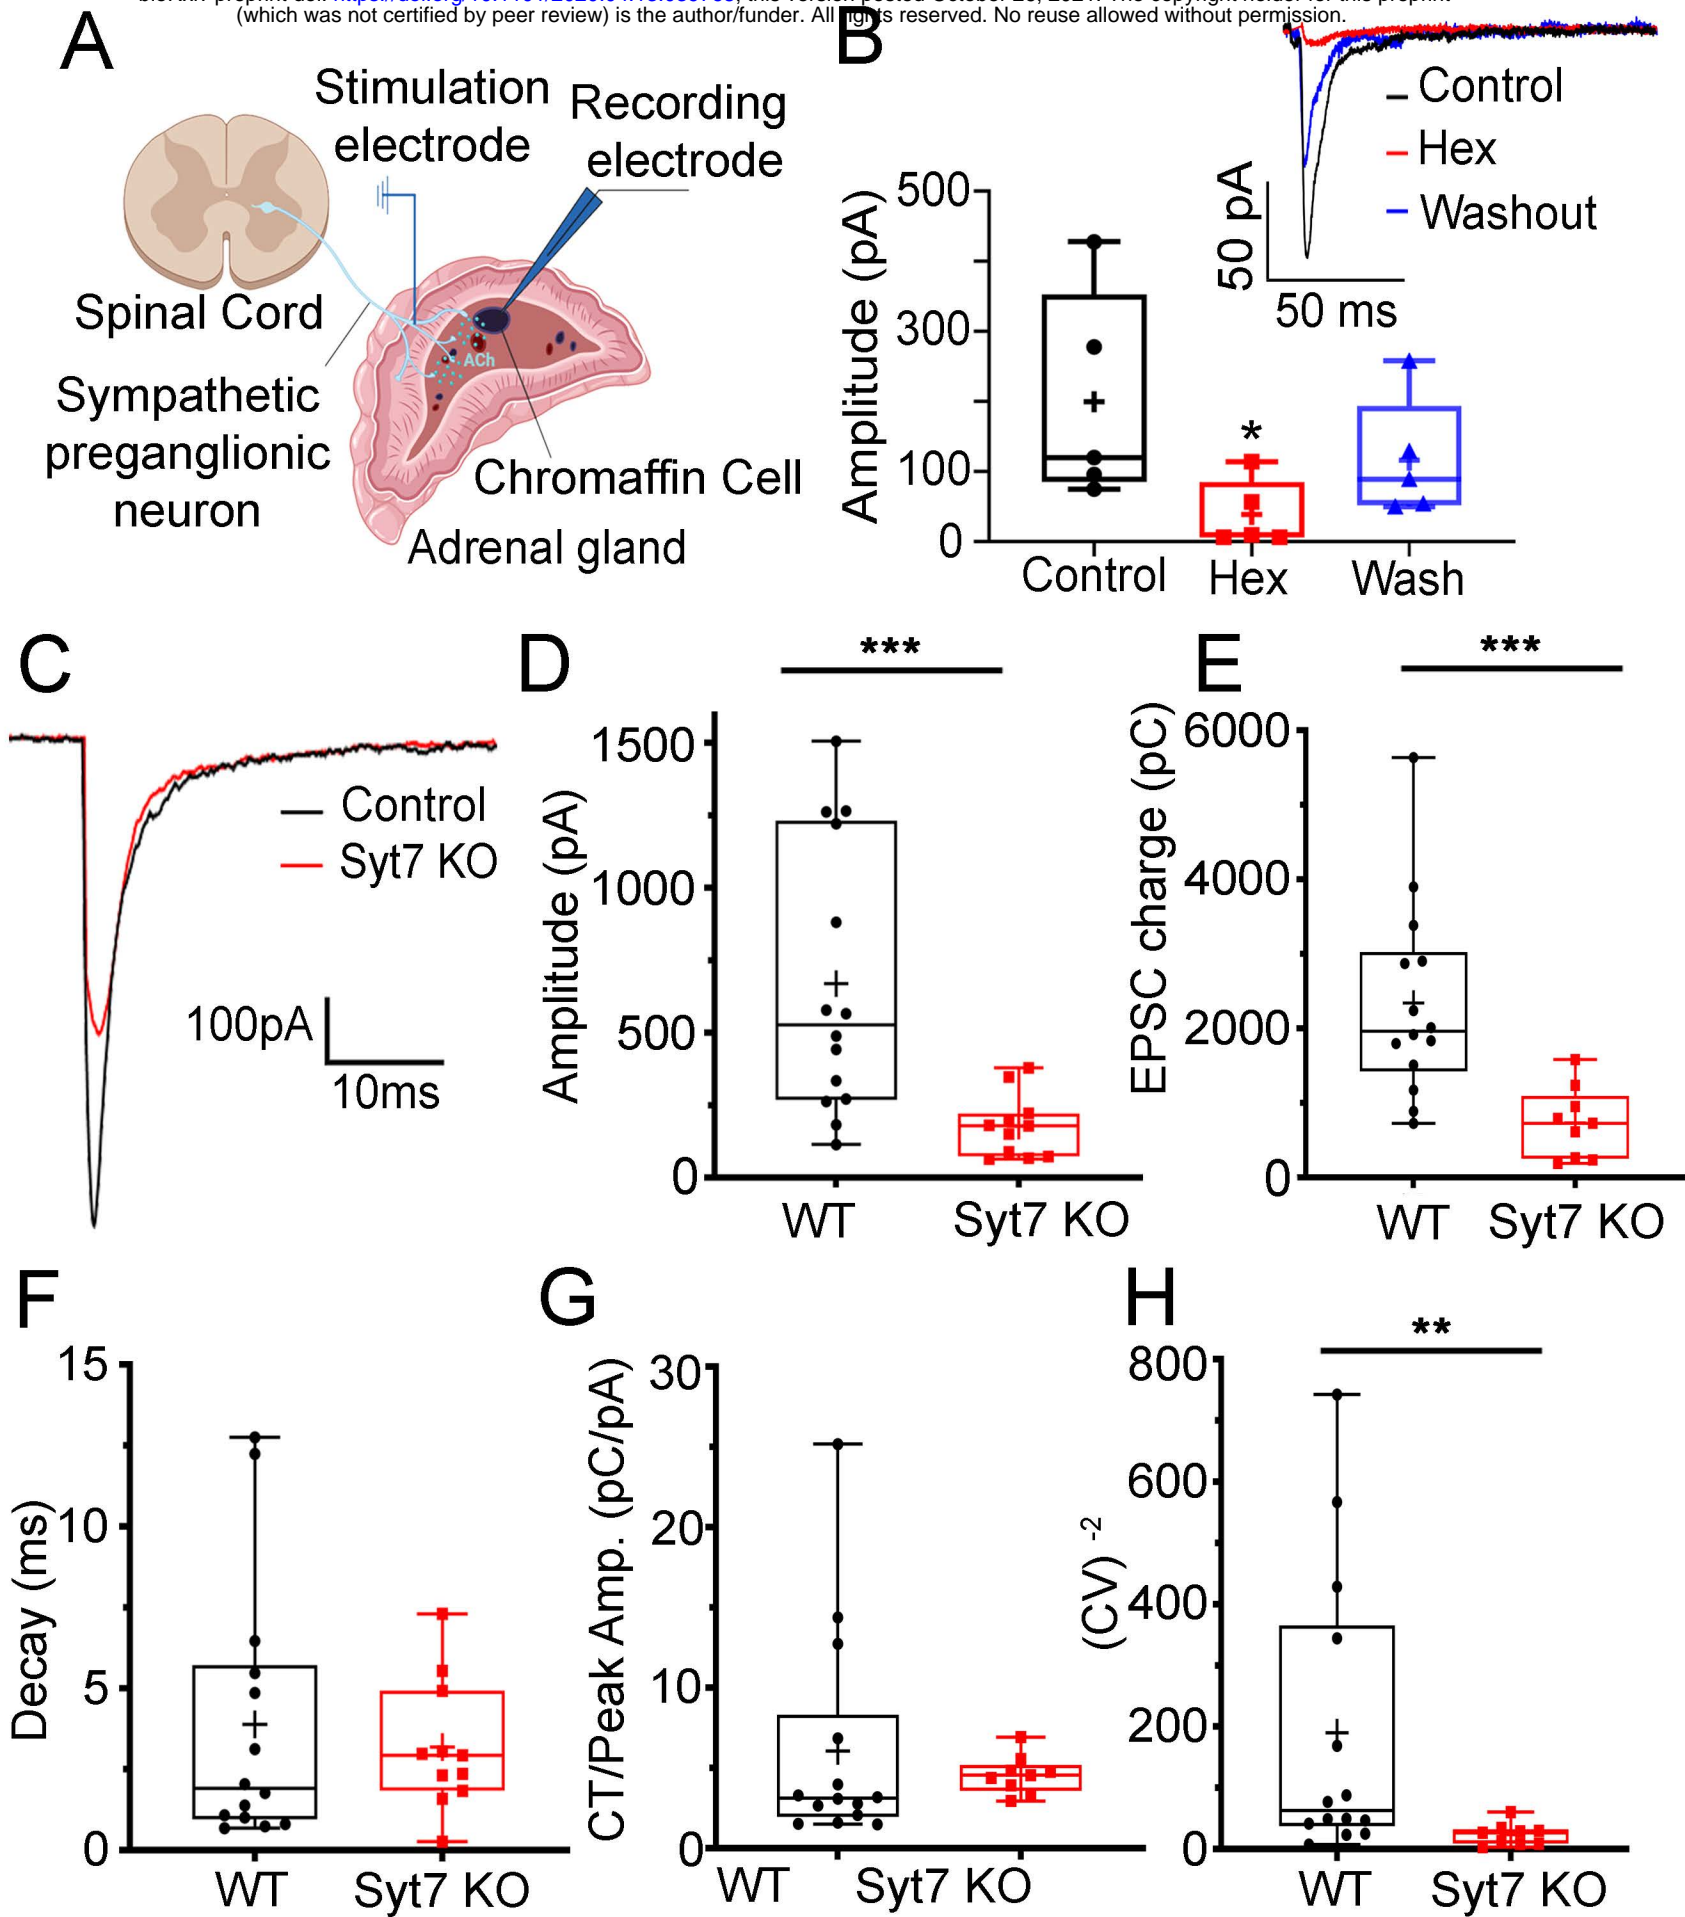

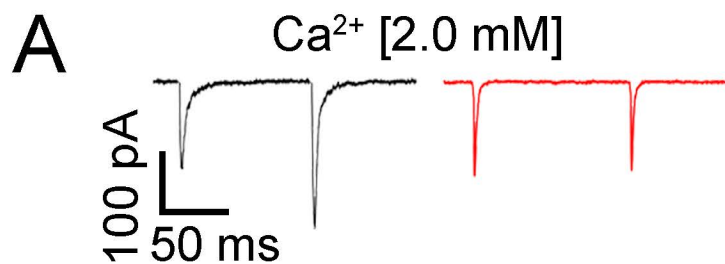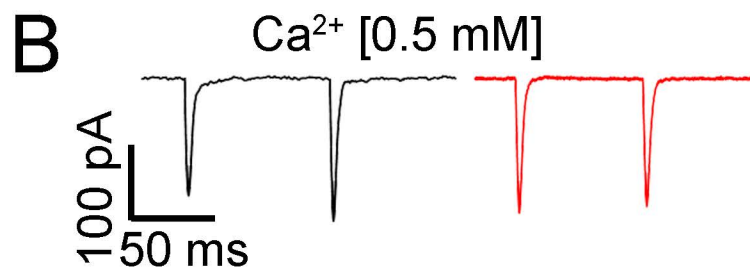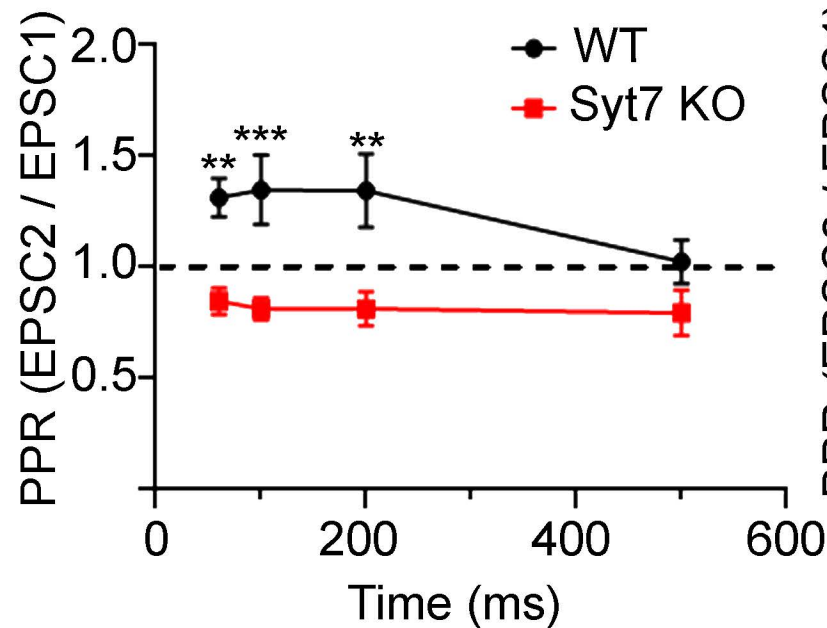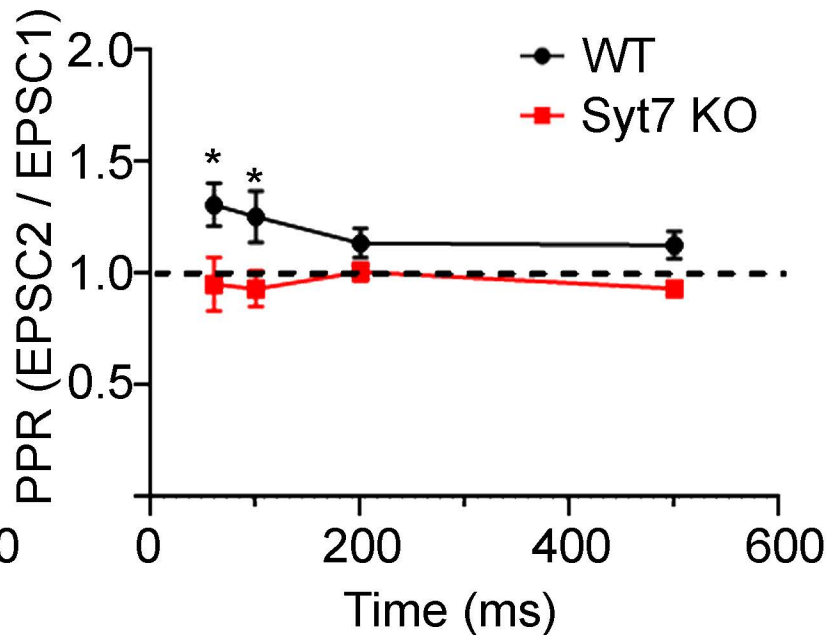



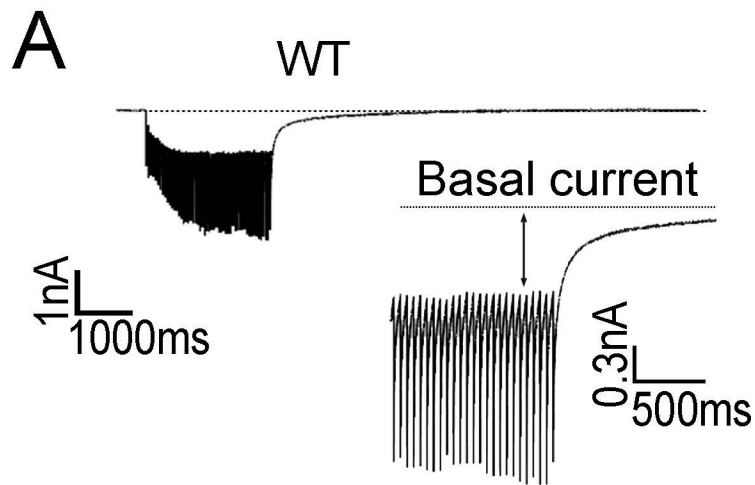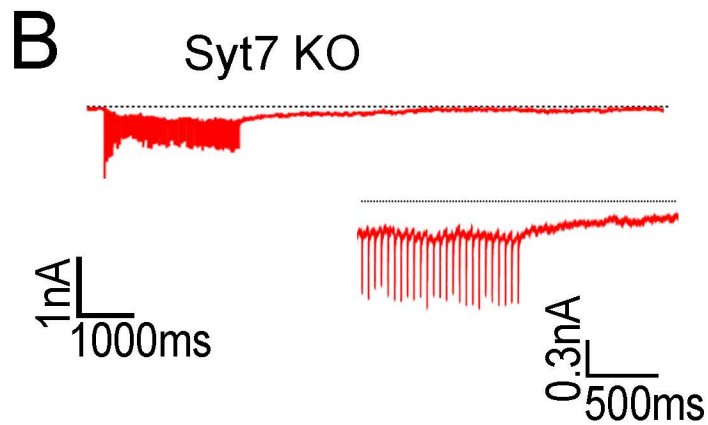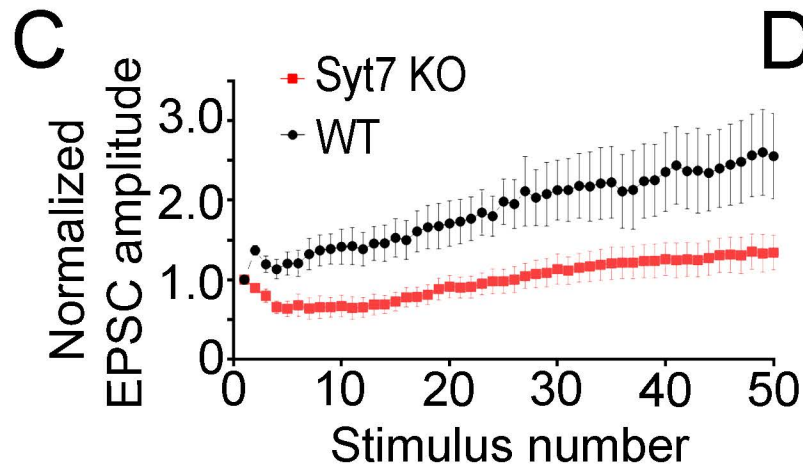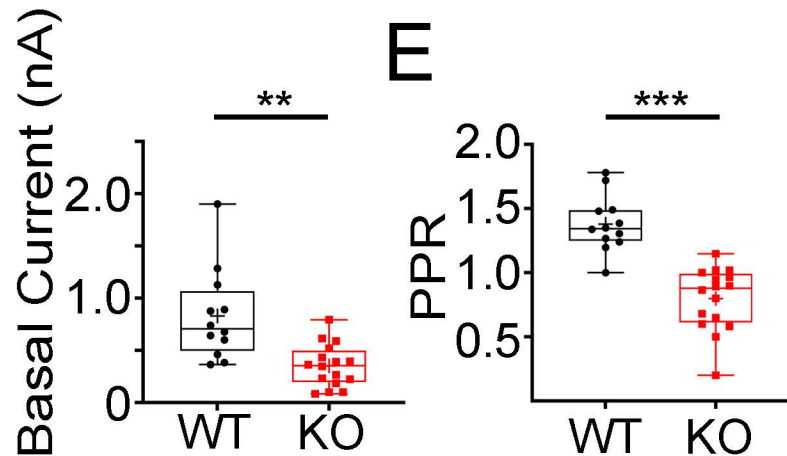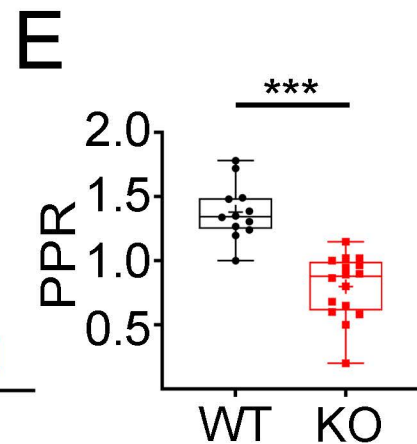

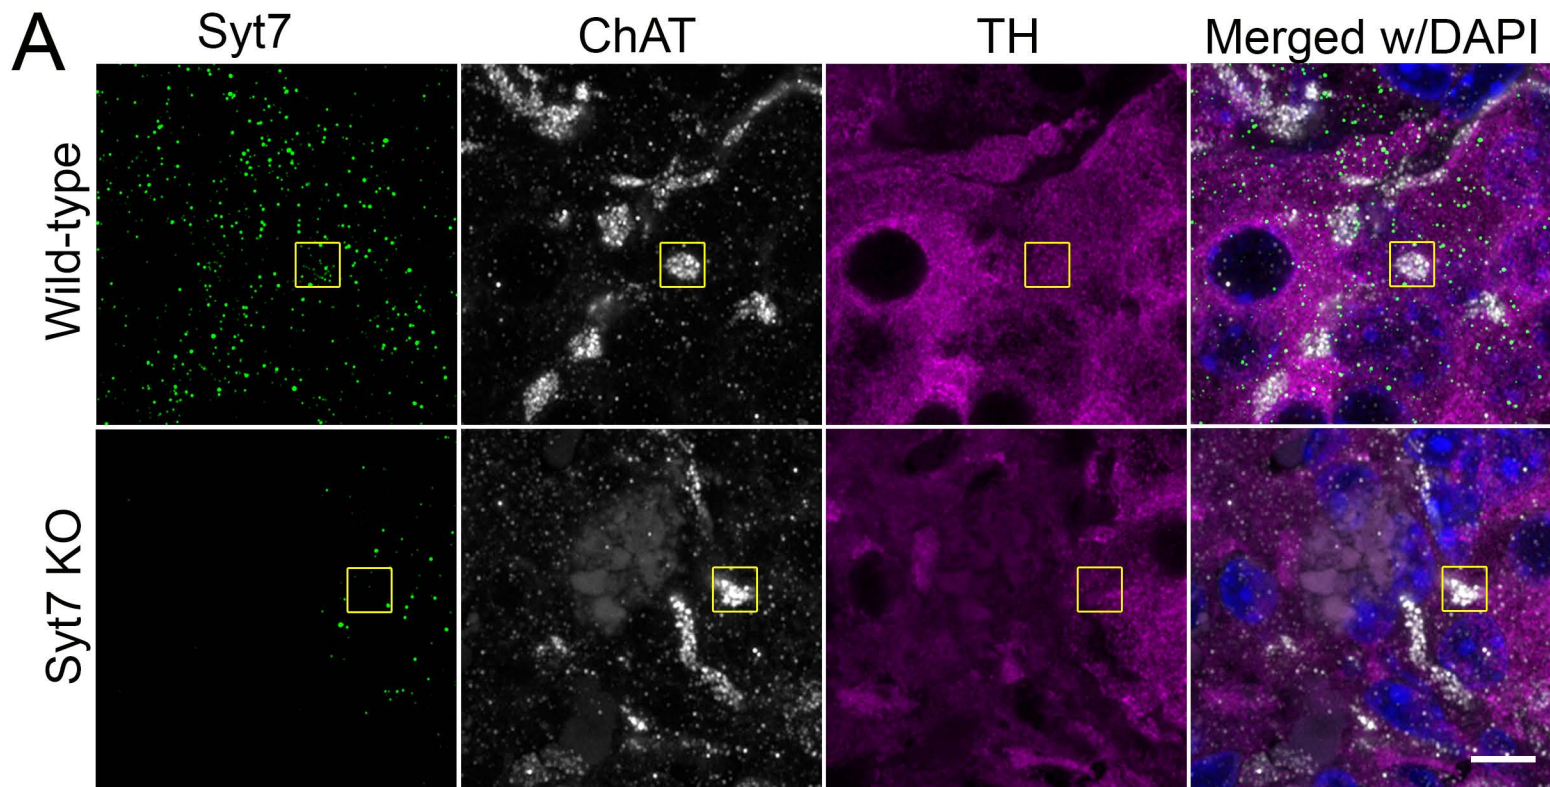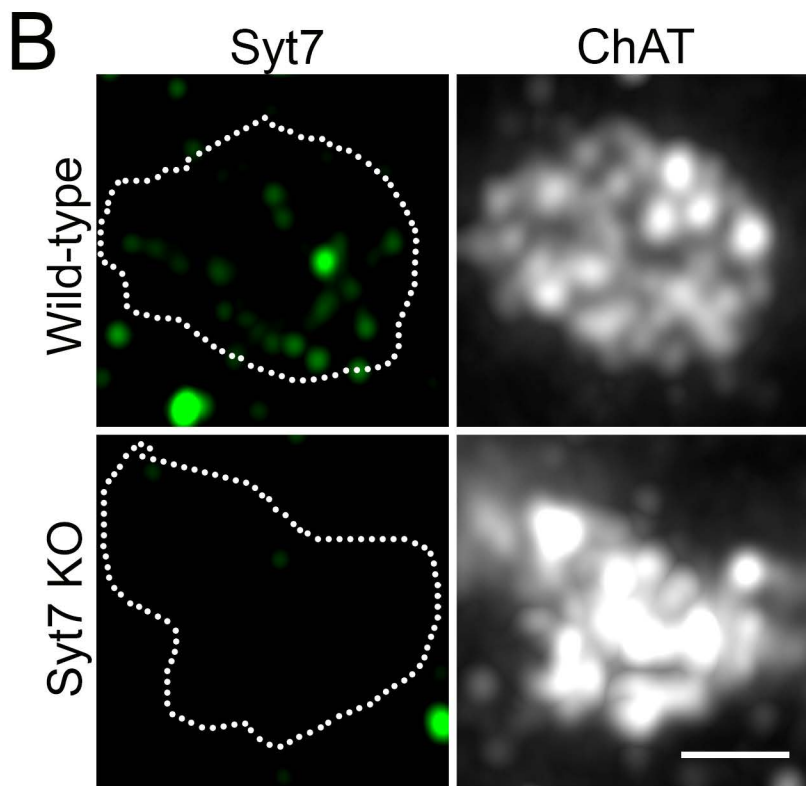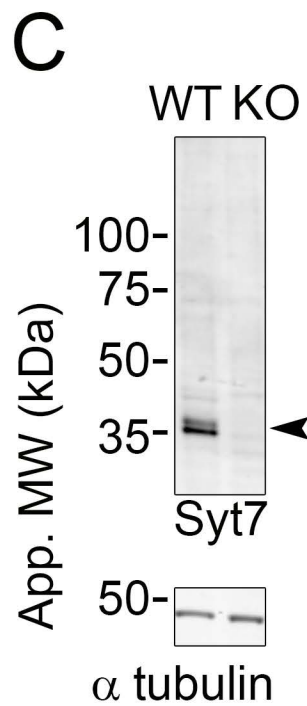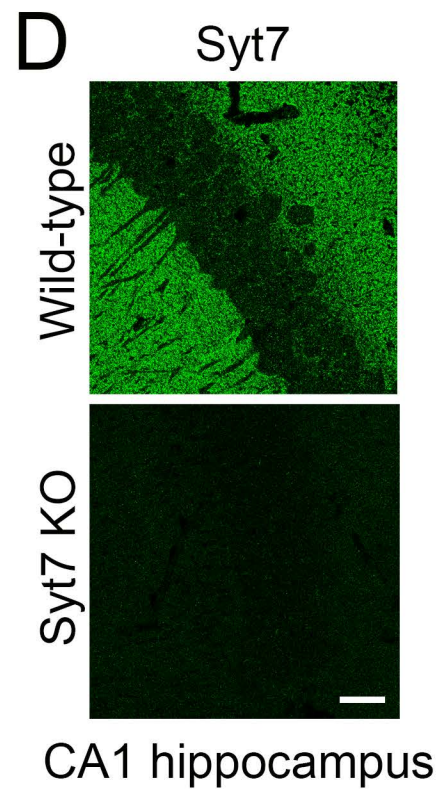

Source: https://www.biorxiv.org/content/10.1101/2020.04.13.039768v3.full.pdf
